# Supplementary material
Source: Springer Nature journal article supplement (https://www.springermedizin.de/resource/supplementary/12939_2007_92_MOESM2_ESM.pdf/9551464)

**Male mortality by mouth and pharynx cancer**

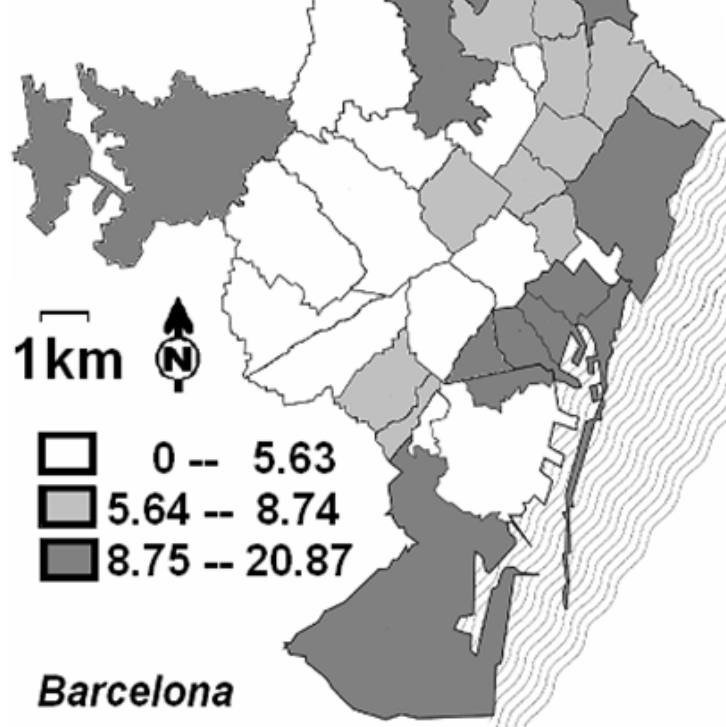

**Male mortality by mouth and pharynx cancer**

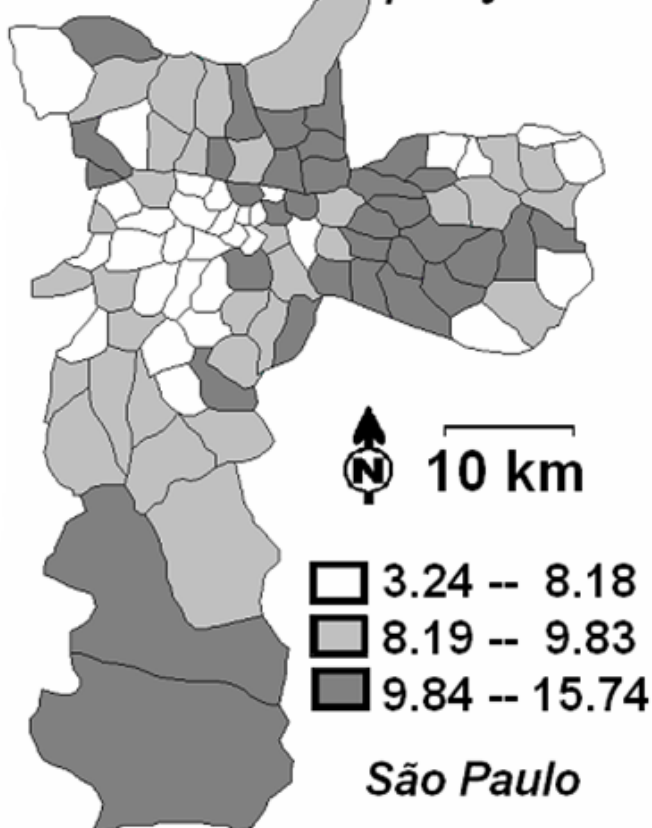

**Human development index**

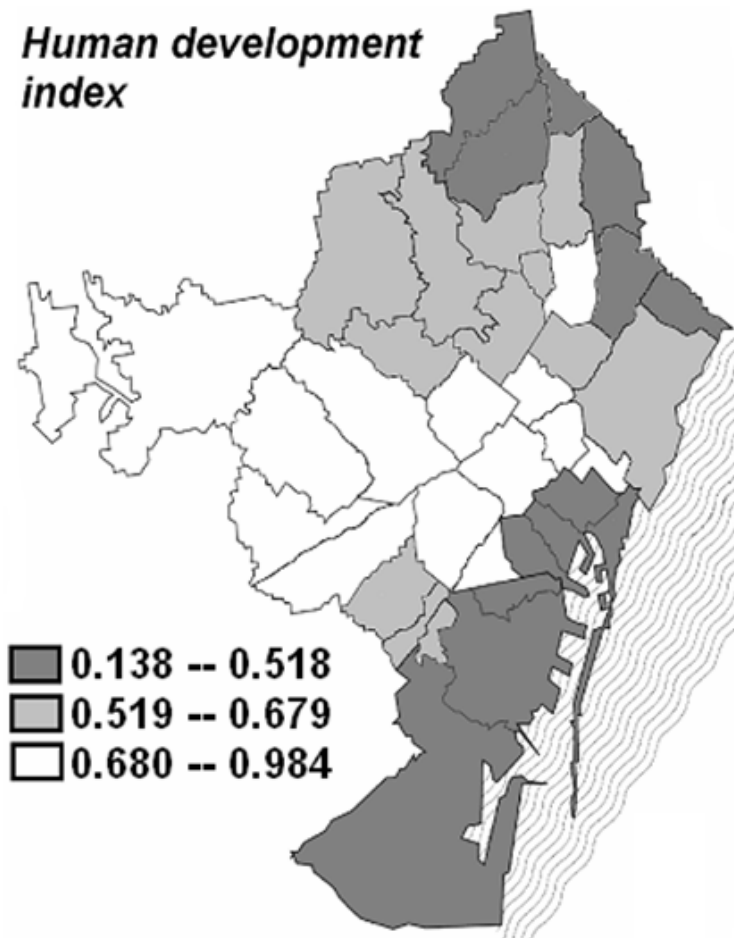

**Human development index**

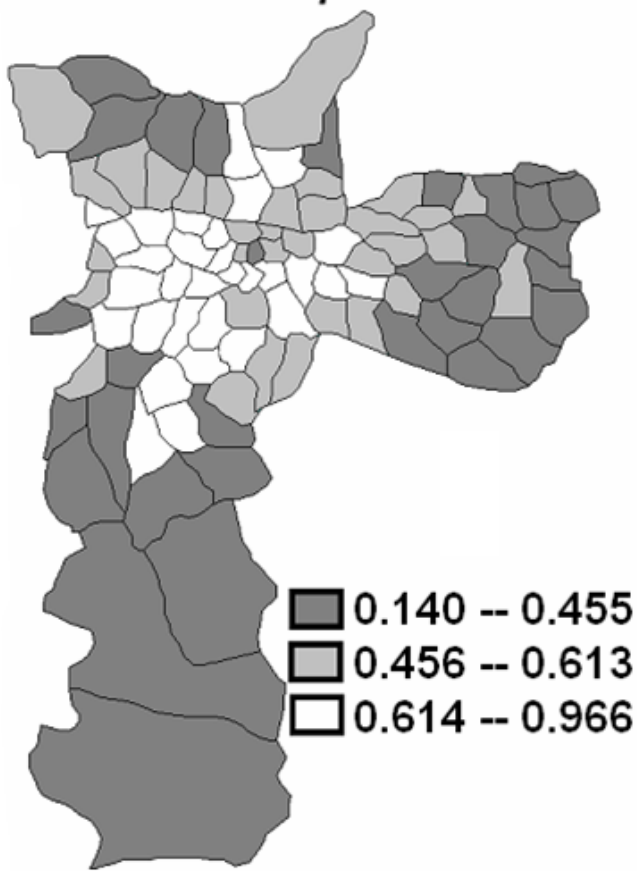

Supplement: MOESM2 [file 9551464]
